# Supplementary material for: LAG3/CD4 Genes Variants and the Risk for Restless Legs Syndrome
Source: MDPI journal article supplement (doi:10.3390/ijms232314795), 2022-11-26
Supplement: s1 [file s1]

## Supplementary Material

# ***LAG3/CD4* Genes Variants and the Risk for Restless Legs Syndrome**

Félix Javier Jiménez-Jiménez <sup>1,\*</sup>, Javier Gómez-Tabales <sup>2</sup>, Hortensia Alonso-Navarro <sup>1</sup>, Christopher Rodríguez <sup>2</sup>, Laura Turpín-Fenoll <sup>3</sup>, Jorge Millán-Pascual <sup>3</sup>, Ignacio Álvarez <sup>4,5</sup>, Pau Pastor <sup>4,5,6</sup>, Marisol Calleja <sup>1</sup>, Rafael García-Ruiz <sup>3</sup>, Santiago Navarro-Muñoz <sup>3</sup>, Marta Recio-Bermejo <sup>3</sup>, José Francisco Plaza-Nieto <sup>1</sup>, Esteban García-Albea <sup>7</sup>, Elena García-Martín <sup>2</sup> and José A. G. Agúndez <sup>2</sup>

<sup>1</sup> Section of Neurology, Hospital Universitario del Sureste, E28500 Arganda del Rey, Spain

<sup>2</sup> ARADyAL Instituto de Salud Carlos III, University Institute of Molecular Pathology Biomarkers, Universidad de Extremadura, E10003 Cáceres, Spain

<sup>3</sup> Section of Neurology, Hospital La Mancha-Centro, E13600 Alcázar de San Juan, Spain

<sup>4</sup> Fundació per la Recerca Biomèdica i Social Mútua de Terrassa, E08221 Terrassa, Spain

<sup>5</sup> Movement Disorders Unit, Department of Neurology, Hospital Universitari Mutua de Terrassa, E08221 Terrassa, Spain

<sup>6</sup> Unit of Neurodegenerative Diseases, Department of Neurology, The Germans Trias i Pujol Research Institute (IGTP), University Hospital Germans Trias i Pujol, E08916 Badalona, Spain

<sup>7</sup> Department of Medicine-Neurology, Universidad de Alcalá, E28801 Alcalá de Henares, Spain

\* Correspondence: [fjavier.jimenez@salud.madrid.org](mailto:fjavier.jimenez@salud.madrid.org) or [felix.jimenez@sen.es](mailto:felix.jimenez@sen.es); Tel.: +34-636-968-395

**Supplementary Table S1. Genotypes and allelic variants of female patients with RLS and healthy controls. The values in each cell represent the number (percentage; 95% confidence intervals) P: crude probability; Pc: probability after multiple comparisons; NPV: negative predictive value.**

| <b>GENOTYPES</b> | <b><i>RLS WOMEN (N=217)</i></b>              | <b><i>CONTROL WOMEN (N=270)</i></b>              | <b><i>INTERGROUP COMPARISON<br/>OR (95%CI), P; PC ; NPV (95%CI)</i></b> |
|------------------|----------------------------------------------|--------------------------------------------------|-------------------------------------------------------------------------|
| rs1922452 A/A    | 39 (18.0; 12.9-23.1)                         | 46 (17.0; 12.6-21.5)                             | 1.07 (0.67-1.71); 0.787; 0.852; 0.56 (0.54-0.58)                        |
| rs1922452 A/G    | 106 (48.8; 42.2-55.5)                        | 126 (46.7; 40.7-52.6)                            | 1.09 (0.76-1.56); 0.632; 0.852; 0.57 (0.52-0.61)                        |
| rs1922452 G/G    | 72 (33.2; 26.9-39.4)                         | 98 (36.3; 30.6-42.0)                             | 0.88 (0.60-1.27); 0.474; 0.852; 0.54 (0.51-0.58)                        |
| rs951818 A/A     | 71 (32.7; 26.5-39.0)                         | 96 (35.6; 29.8-41.3)                             | 0.88 (0.60-1.29); 0.513; 0.852; 0.54 (0.51-0.58)                        |
| rs951818 A/C     | 114 (52.5; 45.9-59.2)                        | 131 (48.5; 42.6-54.5)                            | 1.17 (0.82-1.68); 0.379; 0.852; 0.57 (0.53-0.62)                        |
| rs951818 C/C     | 32 (14.7; 10.0-19.5)                         | 43 (15.9; 11.6-20.3)                             | 0.91 (0.56-1.50); 0.720; 0.852; 0.55 (0.53-0.57)                        |
| rs870849 C/C     | 87 (40.1; 33.6-46.6)                         | 106 (39.3; 33.4-45.1)                            | 1.04 (0.72-1.49); 0.852; 0.852; 0.56 (0.52-0.60)                        |
| rs870849 C/T     | 102 (47.0; 40.4-53.6)                        | 132 (48.9; 42.9-54.9)                            | 0.93 (0.65-1.33); 0.679; 0.852; 0.55 (0.50-0.59)                        |
| rs870849 T/T     | 28 (12.9; 8.4-17.4)                          | 32 (11.9; 8.0-15.7)                              | 1.10 (0.64-1.89); 0.726; 0.852; 0.56 (0.54-0.58)                        |
| <b>ALLELES</b>   | <b><i>RLS WOMEN<br/>(N= 434 ALLELES)</i></b> | <b><i>CONTROL WOMEN<br/>(N= 540 ALLELES)</i></b> | <b><i>INTERGROUP COMPARISON<br/>OR (95%CI), P; PC ; NPV (95%CI)</i></b> |
| rs1922452 A      | 184 (42.4; 37.7-47.0)                        | 218 (40.4; 36.2-44.5)                            | 1.09 (0.84-1.41); 0.523; 0.972; 0.56 (0.54-0.59)                        |
| rs1922452 G      | 250 (57.6; 53.0-62.3)                        | 322 (59.6; 55.5-63.8)                            | 0.92 (0.71-1.19); 0.523; 0.972; 0.54 (0.50-0.58)                        |
| rs951818 A       | 256 (59.0; 54.4-63.6)                        | 323 (59.8; 55.7-64.0)                            | 0.97 (0.75-1.25); 0.794; 0.972; 0.55 (0.51-0.59)                        |
| rs951818 C       | 178 (41.0; 36.4-45.6)                        | 217 (40.2; 36.0-44.3)                            | 1.04 (0.80-1.34); 0.794; 0.972; 0.56 (0.53-0.59)                        |
| rs870849 C       | 276 (63.6; 59.1-68.1)                        | 344 (63.7; 59.6-67.8)                            | 1.00 (0.77-1.29); 0.972; 0.972; 0.55 (0.51-0.60)                        |
| rs870849 T       | 158 (36.4; 31.9-40.9)                        | 196 (36.3; 32.2-40.4)                            | 1.00 (0.77-1.29); 0.972; 0.972; 0.55 (0.51-0.60)                        |

**Supplementary Table S2. Genotypes and allelic variants of male patients with RLS and healthy controls. The values in each cell represent the number (percentage; 95% confidence intervals) P: crude probability; Pc: probability after multiple comparisons; NPV: negative predictive value.**

| <b>GENOTYPES</b> | <b><i>RLS MEN</i><br/>(N=68)</b>               | <b><i>CONTROL MEN</i><br/>(N=80)</b>           | <b><i>INTERGROUP COMPARISON</i><br/><i>OR (95%CI) P; PC ; NPV (95%CI)</i></b> |
|------------------|------------------------------------------------|------------------------------------------------|-------------------------------------------------------------------------------|
| rs1922452 A/A    | 13 (19.1; 9.8-28.5)                            | 13 (16.3; 8.2-24.3)                            | 1.22 (0.52-2.84); 0.649; 0.861; 0.55 (0.51-0.59)                              |
| rs1922452 A/G    | 29 (42.6; 30.9-54.4)                           | 39 (48.8; 37.8-59.7)                           | 0.78 (0.41-1.50); 0.459; 0.861; 0.51 (0.44-0.59)                              |
| rs1922452 G/G    | 26 (38.2; 26.7-49.8)                           | 28 (35.0; 24.5-45.5)                           | 1.15 (0.59-2.25); 0.685; 0.861; 0.55 (0.49-0.62)                              |
| rs951818 A/A     | 28 (41.2; 29.5-52.9)                           | 31 (38.8; 28.1-49.4)                           | 1.11 (0.57-2.14); 0.765; 0.861; 0.55 (0.48-0.62)                              |
| rs951818 A/C     | 30 (44.1; 32.3-55.9)                           | 38 (47.5; 36.6-58.4)                           | 0.87 (0.46-1.67); 0.682; 0.861; 0.53 (0.45-0.61)                              |
| rs951818 C/C     | 10 (14.7; 6.3-23.1)                            | 11 (13.8; 6.2-21.3)                            | 1.08 (0.43-2.73); 0.869; 0.869; 0.54 (0.51-0.58)                              |
| rs870849 C/C     | 33 (48.5; 36.7-60.4)                           | 32 (40.0; 29.3-50.7)                           | 1.41 (0.74-2.72); 0.299; 0.861; 0.58 (0.50-0.65)                              |
| rs870849 C/T     | 26 (38.2; 26.7-49.8)                           | 36 (45.0; 34.1-55.9)                           | 0.76 (0.39-1.46); 0.407; 0.861; 0.51 (0.44-0.59)                              |
| rs870849 T/T     | 9 (13.2; 5.2-21.3)                             | 12 (15.0; 7.2-22.8)                            | 0.86 (0.34-1.20); 0.760; 0.861; 0.54 (0.50-0.57)                              |
| <b>ALLELES</b>   | <b><i>RLS MEN</i><br/>(N= 136<br/>ALLELES)</b> | <b><i>CONTROL MEN</i><br/>(N= 160 ALLELES)</b> | <b><i>INTERGROUP COMPARISON</i><br/><i>OR (95%CI) P; PC ; NPV (95%CI)</i></b> |
| rs1922452 A      | 55 (40.4; 32.2-48.7)                           | 65 (40.6; 33.0-48.2)                           | 0.99 (0.62-1.58); 0.974; 0.974; 0.54 (0.49-0.59)                              |
| rs1922452 G      | 81 (59.6; 51.3-67.8)                           | 95 (59.4; 51.8-67.0)                           | 1.01 (0.63-1.61); 0.974; 0.974; 0.54 (0.47-0.61)                              |
| rs951818 A       | 86 (63.2; 55.1-71.3)                           | 100 (62.5; 55.0-70.0)                          | 1.03 (0.64-1.66); 0.896; 0.974; 0.55 (0.47-0.62)                              |
| rs951818 C       | 50 (36.8; 28.7-44.9)                           | 60 (37.5; 30.0-45.0)                           | 0.97 (0.60-1.56); 0.896; 0.974; 0.54 (0.49-0.58)                              |
| rs870849 C       | 92 (67.6; 59.8-75.5)                           | 100 (62.5; 55.0-70.0)                          | 1.26 (0.78-2.03); 0.356; 0.974; 0.58 (0.50-0.66)                              |
| rs870849 T       | 44 (32.4; 24.5-40.2)                           | 60 (37.5; 30.0-45.0)                           | 0.78 (0.49-1.29); 0.356; 0.974; 0.52 (0.48-0.57)                              |

**Supplementary Table S3. Genotypes and allelic variants of patients with RLS distributed by response to dopamine agonists. The values in each cell represent the number (percentage; 95% confidence intervals).**

| <b>GENOTYPES</b> | <b>POSITIVE RESPONSE TO DOPAMINE AGONISTS (N=222)</b>         | <b>NEGATIVE RESPONSE TO DOPAMINE AGONISTS (N=18)</b>         | <b>INTERGROUP COMPARISON VALUES<br/><i>OR (95%CI) P; PC; NPV OR (95%CI)</i></b> |
|------------------|---------------------------------------------------------------|--------------------------------------------------------------|---------------------------------------------------------------------------------|
| rs1922452 A/A    | 37 (16.7; 11.8-21.6)                                          | 4 (22.2; 3.0-41.4)                                           | 0.70 (0.22-2.25); 0.548; 0.789; 0.07 (0.05-0.08)                                |
| rs1922452 A/G    | 105 (47.3; 40.7-53.9)                                         | 7 (38.9; 16.4-61.4)                                          | 1.41 (0.53-3.77); 0.493; 0.789; 0.09 (0.05-0.12)                                |
| rs1922452 G/G    | 80 (36.0; 29.7-42.4)                                          | 7 (38.9; 16.4-61.4)                                          | 0.89 (0.33-2.37); 0.809; 0.910; 0.07 (0.04-0.10)                                |
| rs951818 A/A     | 85 (38.3; 31.9-44.7)                                          | 4 (22.2; 3.0-41.4)                                           | 2.17 (0.69-6.19); 0.176; 0.789; 0.09 (0.06-0.11)                                |
| rs951818 A/C     | 109 (49.1; 42.5-55.7)                                         | 10 (55.6; 32.6-78.5)                                         | 0.77 (0.29-2.03); 0.599; 0.789; 0.07 (0.03-0.10)                                |
| rs951818 C/C     | 28 (12.6; 8.2-17.0)                                           | 4 (22.2; 3.0-41.4)                                           | 0.51 (0.16-1.64); 0.250; 0.789; 0.07 (0.05-0.08)                                |
| rs870849 C/C     | 100 (45.0; 38.5-51.6)                                         | 7 (38.9; 16.4-61.4)                                          | 1.29 (0.48-3.45); 0.614; 0.789; 0.08 (0.05-0.11)                                |
| rs870849 C/T     | 97 (43.7; 37.2-50.2)                                          | 8 (44.4; 21.5-67.4)                                          | 0.97 (0.37-2.55); 0.951; 0.951; 0.07 (0.04-0.10)                                |
| rs870849 T/T     | 25 (11.3; 7.1-15.4)                                           | 3 (16.7; -0.6-33.9)                                          | 0.64 (0.17-2.35); 0.493; 0.789; 0.07 (0.05-0.08)                                |
| <b>ALLELES</b>   | <b>POSITIVE RESPONSE TO DOPAMINE AGONISTS (N=444 ALLELES)</b> | <b>NEGATIVE RESPONSE TO DOPAMINE AGONISTS (N=36 ALLELES)</b> | <b>INTERGROUP COMPARISON VALUES<br/><i>OR (95%CI) P; PC; NPV OR (95%CI)</i></b> |
| rs1922452 A      | 179 (40.3; 35.8-44.9)                                         | 15 (41.7; 25.6-57.8)                                         | 0.95 (0.48-1.88); 0.874; 0.874; 0.07 (0.05-0.09)                                |
| rs1922452 G      | 265 (59.7; 55.1-64.2)                                         | 21 (58.3; 42.2-74.4)                                         | 1.06 (0.53-2.11); 0.874; 0.874; 0.08 (0.05-0.11)                                |
| rs951818 A       | 279 (62.8; 58.3-67.3)                                         | 18 (50.0; 33.7-66.3)                                         | 1.69 (0.86-3.34); 0.128; 0.384; 0.10 (0.07-0.13)                                |
| rs951818 C       | 165 (37.2; 32.7-41.7)                                         | 18 (50.0; 33.7-66.3)                                         | 0.59 (0.30-1.17); 0.128; 0.384; 0.06 (0.04-0.08)                                |
| rs870849 C       | 297 (66.9; 62.5-71.3)                                         | 22 (61.1; 45.2-77.0)                                         | 1.29 (0.64-2.59); 0.480; 0.720; 0.09 (0.05-0.13)                                |
| rs870849 T       | 147 (33.1; 28.7-37.5)                                         | 14 (38.9; 23.0-54.8)                                         | 0.78 (0.39-1.56); 0.480; 0.720; 0.07 (0.05-0.09)                                |

**Supplementary Table S4. Genotypes and allelic variants of patients with RLS distributed by response to clonazepam (CNZ). The values in each cell represent the number (percentage; 95% confidence intervals).**

| GENOTYPES     | POSITIVE RESPONSE TO CNZ (N=92)          | NEGATIVE RESPONSE TO CNZ (N=16)         | INTERGROUP COMPARISON VALUES<br><i>OR (95%CI) P; PC; NPV OR (95%CI)</i> |
|---------------|------------------------------------------|-----------------------------------------|-------------------------------------------------------------------------|
| rs1922452 A/A | 22 (23.9; 15.2-32.6)                     | 1 (6.3; -5.6-18.1)                      | 4.71 (0.59-37.74); 0.113; 0.337; 0.18 (0.13-0.19)                       |
| rs1922452 A/G | 39 (42.4; 32.3-52.5)                     | 6 (37.5; 13.8-61.2)                     | 1.23 (0.41-3.66); 0.715; 0.715; 0.16 (0.10-0.21)                        |
| rs1922452 G/G | 31 (33.7; 24.0-43.4)                     | 9 (56.3; 31.9-80.6)                     | 0.40 (0.13-1.16); 0.086; 0.337; 0.10 (0.05-0.16)                        |
| rs951818 A/A  | 30 (32.6; 23.0-42.2)                     | 8 (50.0; 25.5-74.5)                     | 0.48 (0.17-1.41); 0.181; 0.337; 0.11 (0.06-0.17)                        |
| rs951818 A/C  | 49 (53.3; 43.1-63.5)                     | 7 (43.8; 19.4-68.1)                     | 1.47 (0.50-4.27); 0.484; 0.622; 0.17 (0.10-0.24)                        |
| rs951818 C/C  | 13 (14.1; 7.0-21.2)                      | 1 (6.3; -5.6-18.1)                      | 2.47 (0.30-20.31); 0.389; 0.584; 0.16 (0.12-0.17)                       |
| rs870849 C/C  | 40 (43.5; 33.3-53.6)                     | 6 (37.5; 13.8-61.2)                     | 1.28 (0.43-3.82); 0.657; 0.715; 0.16 (0.10-0.22)                        |
| rs870849 C/T  | 41 (44.6; 34.4-54.7)                     | 10 (62.5; 38.8-86.2)                    | 0.48 (0.16-1.44); 0.187; 0.337; 0.11 (0.05-0.18)                        |
| rs870849 T/T  | 11 (12.0; 5.3-18.6)                      | 0 (0.0; 0.0-0.0)                        | 1.20 (0.82-1.20) <sup>1</sup> ; 0.146; 0.337; 0.17 (0.13-0.17)          |
| ALLELES       | POSITIVE RESPONSE TO CNZ (N=184 ALLELES) | NEGATIVE RESPONSE TO CNZ (N=32 ALLELES) | INTERGROUP COMPARISON VALUES<br><i>OR (95%CI) P; PC; NPV OR (95%CI)</i> |
| rs1922452 A   | 83 (45.1; 37.9-52.3)                     | 8 (25.0; 10.0-40.0)                     | 2.47 (1.06-5.78); 0.034; 0.102; 0.19 (0.15-0.22)                        |
| rs1922452 G   | 101 (54.9; 47.7-62.1)                    | 24 (75.0; 60.0-90.0)                    | 0.41 (0.17-0.95); 0.034; 0.102; 0.09 (0.04-0.15)                        |
| rs951818 A    | 109 (59.2; 52.1-66.3)                    | 23 (71.9; 56.3-87.5)                    | 0.57 (0.25-1.30); 0.177; 0.266; 0.11 (0.06-0.17)                        |
| rs951818 C    | 75 (40.8; 33.7-47.9)                     | 9 (28.1; 12.5-43.7)                     | 1.76 (0.77-4.01); 0.177; 0.266; 0.17 (0.13-0.21)                        |
| rs870849 C    | 121 (65.8; 58.9-72.6)                    | 22 (68.8; 52.7-84.8)                    | 0.87 (0.39-1.96); 0.742; 0.742; 0.14 (0.08-0.213)                       |
| rs870849 T    | 63 (34.2; 27.4-41.1)                     | 10 (31.3; 15.2-47.3)                    | 1.15 (0.51-2.57); 0.742; 0.742; 0.15 (0.12-0.19)                        |

Armitage's test for trend with the number of variant rs1922452 alleles = Z- squared = 3.95, P = 0.047. <sup>1</sup> The RR value is shown instead of the OR because at least one of the values in the comparison is equal to 0.

**Supplementary Table S5. Genotypes and allelic variants of patients with RLS distributed by response to GABAergic drugs. The values in each cell represent the number (percentage; 95% confidence intervals).**

| <b>GENOTYPES</b> | <b>POSITIVE RESPONSE TO GABAERGIC DRUGS (N=51)</b>          | <b>NEGATIVE RESPONSE TO GABAERGIC DRUGS (N=12)</b>         | <b>INTERGROUP COMPARISON VALUES<br/><i>OR (95%CI), P; PC; NPV OR (95%CI)</i></b> |
|------------------|-------------------------------------------------------------|------------------------------------------------------------|----------------------------------------------------------------------------------|
| rs1922452 A/A    | 12 (23.5; 11.9-35.2)                                        | 2 (16.7; -4.4-37.8)                                        | 1.54 (0.30-8.01); 0.610; 0.620; 0.20 (0.14-0.24)                                 |
| rs1922452 A/G    | 17 (33.3; 20.4-46.3)                                        | 6 (50.0; 21.7-78.3)                                        | 0.50 (0.14-1.79); 0.284; 0.535; 0.15 (0.07-0.23)                                 |
| rs1922452 G/G    | 22 (43.1; 29.5-56.7)                                        | 4 (33.3; 6.7-60.0)                                         | 1.52 (0.41-5.69); 0.538; 0.620; 0.22 (0.12-0.29)                                 |
| rs951818 A/A     | 18 (35.3; 22.2-48.4)                                        | 1 (8.3; -7.3-24.0)                                         | 6.00 (0.72-50.30); 0.069; 0.273; 0.25 (0.17-0.27)                                |
| rs951818 A/C     | 22 (43.1; 29.5-56.7)                                        | 10 (83.3; 62.2-104.4)                                      | 0.15 (0.03-0.76); 0.013; 0.117; 0.07 (0.01-0.18)                                 |
| rs951818 C/C     | 11 (21.6; 10.3-32.9)                                        | 1 (8.3; -7.3-24.0)                                         | 3.03 (0.35-26.05); 0.297; 0.535; 0.22 (0.15-0.23)                                |
| rs870849 C/C     | 21 (41.2; 27.7-54.7)                                        | 4 (33.3; 6.7-60.0)                                         | 1.40 (0.37-5.26); 0.620; 0.620; 0.21 (0.12-0.28)                                 |
| rs870849 C/T     | 26 (51.0; 37.3-64.7)                                        | 5 (41.7; 13.8-69.6)                                        | 1.46 (0.41-1.20); 0.565; 0.620; 0.22 (0.11-0.31)                                 |
| rs870849 T/T     | 4 (7.8; 0.5-15.2)                                           | 3 (25.0; 0.5-49.5)                                         | 0.26 (0.05-1.34); 0.091; 0.273; 0.16 (0.12-0.20)                                 |
| <b>ALLELES</b>   | <b>POSITIVE RESPONSE TO GABAERGIC DRUGS (N=110 ALLELES)</b> | <b>NEGATIVE RESPONSE TO GABAERGIC DRUGS (N=24 ALLELES)</b> | <b>INTERGROUP COMPARISON VALUES<br/><i>OR (95%CI), P; PC; NPV OR (95%CI)</i></b> |
| rs1922452 A      | 41 (40.2; 30.7-49.7)                                        | 10 (41.7; 21.9-61.4)                                       | 0.94 (0.38-2.32); 0.895; 0.895; 0.19 (0.12-0.24)                                 |
| rs1922452 G      | 61 (59.8; 50.3-69.3)                                        | 14 (58.3; 38.6-78.1)                                       | 1.06 (0.43-2.62); 0.895; 0.895; 0.20 (0.11-0.29)                                 |
| rs951818 A       | 58 (56.9; 47.3-66.5)                                        | 12 (50.0; 30.0-70.0)                                       | 1.32 (0.54-3.21); 0.544; 0.816; 0.21 (0.13-0.30)                                 |
| rs951818 C       | 44 (43.1; 33.5-52.7)                                        | 12 (50.0; 30.0-70.0)                                       | 0.76 (0.31-1.85); 0.544; 0.816; 0.17 (0.11-0.24)                                 |
| rs870849 C       | 68 (66.7; 57.5-75.8)                                        | 13 (54.2; 34.2-74.1)                                       | 1.69 (0.69-4.17); 0.252; 0.756; 0.24 (0.15-0.35)                                 |
| rs870849 T       | 34 (33.3; 24.2-42.5)                                        | 11 (45.8; 25.9-65.8)                                       | 0.59 (0.24-1.46); 0.252; 0.756; 0.16 (0.10-0.22)                                 |
